1 **Significance of Oct-4 transcription factor as a pivotal therapeutic target for CD44<sup>+</sup>/24<sup>-</sup>**  
2 **mammary tumour initiating cells; aiming at the root of the recurrence**

3  
4 Utsav Sen<sup>1</sup>, Shanooja Shanavas<sup>1</sup>, Apoorva Gowda<sup>1</sup>, Muhammad Nihad<sup>1</sup>, Hari Krishnareddy  
5 Rachamalla<sup>2,3</sup>, Rajkumar Banerjee<sup>2,3</sup>, Sudheer Shenoy P\*<sup>1</sup>, Bipasha Bose\*<sup>1</sup>

6 <sup>1</sup>*Stem cells and regenerative medicine centre, Yenepoya Research Centre, Yenepoya (Deemed*  
7 *to be university), Deralakatte, Mangalore-575018, Karnataka.*

8 <sup>2</sup>*Applied Biology Division, CSIR-Indian Institute of Chemical Technology, Uppal Road,*  
9 *Hyderabad, Telangana-500007, India.*

10 <sup>3</sup>*Academy of Scientific & Innovative Research (AcSIR), CSIR-HRDC Campus, Ghaziabad,*  
11 *Uttar Pradesh-201002, India.*

12

13

14

15

16

17

18

19

20

21

22

23

24

25

26

27

28

29 **\*Correspondence:** Bipasha Bose ([Bipasha.bose@yenepoya.edu.in](mailto:Bipasha.bose@yenepoya.edu.in),  
30 [Bipasha.bose@gmail.com](mailto:Bipasha.bose@gmail.com)) +91 9730889609. Sudheer Shenoy P. ([shenoy@yenepoya.edu.in](mailto:shenoy@yenepoya.edu.in),  
31 [shenoy2000@yahoo.com](mailto:shenoy2000@yahoo.com))  
32 +91 9108585282.  
33

34 **Address:** Stem Cells and Regenerative Medicine Centre, Yenepoya Research Centre,  
35 Yenepoya Deemed to be University, University Road, Deralakatte, Mangalore, 575018,  
36 Karnataka, India.

37 **Abstract:**

38 Breast cancer (BC) remains one of the deadliest and frequently diagnosed metastatic cancers  
39 worldwide. Cancer stem cells (CSCs) are the cell population within the tumour niche, having  
40 an epithelial to mesenchymal (EMT) transition phenotype, high self-renewal, vigorous  
41 metastatic capacity, drug resistance, and tumour relapse. Identification of targets for  
42 induction of apoptosis is essential to provide novel therapeutic approaches in BC. Our earlier  
43 studies showed that Vitamin C induces apoptotic cell death by losing redox balance in TNBC  
44 CSCs. In this study, we have attempted to identify previously unrecognized CSC survival  
45 factors that can be used as druggable targets for bCSCs apoptosis regulators isolated from the  
46 TNBC line, MDA MB 468. After a thorough literature review, Oct-4 was identified as the  
47 most promising marker for its unique abundance in cancer and absence in normal cells and  
48 the contribution of Oct-4 to the sustenance of cancer cells. We then validated a very high  
49 expression of Oct-4 in the MDA MB 468 bCSCs population using flow-cytometry. The loss  
50 of Oct-4 was carried out using siRNA-mediated knockdown in the bCSCs, followed by  
51 assessing for cellular apoptosis. Our results indicated that Oct-4 knockdown induced cell  
52 death, changes in cellular morphology, inhibited mammosphere formation, and positive for  
53 Annexin-V expression, thereby indicating the role of Oct-4 in bCSC survival. Moreover, our  
54 findings also suggest the direct interaction between Oct-4 and Vitamin C using *in silico*  
55 docking. This data, hence, contributes towards novel information about Oct-4 highlighting  
56 this molecule as a novel survival factor in bCSCs.

57

58

59

60

61

62

63

64

65 **Keywords:** *Ascorbic acid, Breast cancer stem cells, Cancer stem cells therapeutics, Oct-4*  
66 *transcription factor, POUF1, siRNA*

67 **1.Introduction:**

68 Triple-negative breast cancer (TNBC) is a notable clinical problem to which 30% of all  
69 patients often turn up with a recurrence of the disease within 2 to 5 years after completion of  
70 treatment (Yin et al., 2020). Despite extensive progress in BC's diagnosis and treatment,  
71 several clinical and scientific problems remain unsolved (Harbeck et al., 2019). Procedures  
72 for advanced stages of this disease are still relatively limited and inefficient (Mattina et al.,  
73 2016). The limitation of these therapies is due to not yet efficiently targeting two essential  
74 events that are happening to the breast cancer cells, i.e., epithelial to mesenchymal transition  
75 (EMT) and cancer stem cells (CSCs) turnover (Saadin & White 2013).

76 Based on pathology and gene expression profiling, triple-negative breast cancer cells (ER<sup>-</sup>,  
77 PR<sup>-</sup>, HER2<sup>-</sup>) (TNBCs) are heterogeneous and enriched with CD44<sup>+</sup>/24<sup>-</sup> tumour-initiating  
78 cells or cancer stem cells (TICs/CSCs) (Collina et al., 2015, Das et al., 2017). These  
79 pathobiological modifications make TNBC cells aggressive, metastatic, and less sensitive to  
80 standard chemotherapy and tumour relapse. These cancer stem cells are interlinked with each  
81 other and play crucial roles in BC progression and relapse (Wang et al., 2014; Fabregat,  
82 Malfettone & Soukupova et al., 2016; Radosa et al., 2016). For metastasis, cancer cells  
83 modify their cytoskeleton structure, thus initiating invasion and migration of the CSCs (Fares  
84 et al., 2020). The initiation of the migration invasion and metastasis is associated with EMT  
85 (Kristensen et al., 2011; Li et al., 2017). Where the cells lose the epithelial markers like E-  
86 cadherin, EpCAM, and gain mesenchymal markers like N-cadherin, Vimentin, Snail, and  
87 Twist (Loh et al., 2019).

88 Homeodomain transcription factor of the Pit-Oct-Unc (POU) family, named Octamer-binding  
89 transcription factor 4 (Oct-4) is considered to play an essential role in the self-renewal  
90 epithelial-mesenchymal transition (EMT) (Zeineddine et al., 2014) and drug resistance  
91 development of CSCs and breast cancer metastasis (Wang et al., 2014). Oct-4 is well  
92 established as one of the most important transcription factors that control the self-renewal of  
93 pluripotent stem cells and cancer cells (Kim, & Nam 2011). Most interestingly, Oct-4  
94 expression is predominantly observed in embryonic stem cells (ESCs) or some cancer cells  
95 (Wang & Herlyn 2015). Hence, this uniqueness of abundance and the crucial developmental  
96 and sustenance role could make Oct-4 one of the critical factors worth targeting in stem cell-

97 specific cancer therapy (Wu & Schöler 2014). In our previous study, we have used Vitamin  
98 C, and demonstrated the apoptotic effect of Vitamin C on bCSCs (Liu, Yu & Liu 2013).

99 In this study, we have first isolated the breast CSCs from the TNBC cells MDA MB 468,  
100 using flow-sorting based on surface marker CD44<sup>+</sup>/CD24<sup>-</sup>. Then the abundance of the Oct-4  
101 was confirmed by using flow cytometric analysis in bCSCs. Loss of function of Oct-4 on  
102 bCSCs survival was established upon Oct-4 knockdown using siRNA. In summary, we have  
103 deciphered the importance of the transcription factor Oct-4 in bCSC survival and sustenance.  
104 Also, we sought to determinize the efficiency of Oct-4 as a potential target for the bCSCs  
105 toward cancer/cancer stem cell therapeutics.

## 106 **2.0 Material and Methods:**

### 107 **2.1 Cell culture:**

108 The TNBC line MDA MB 468 was procured from the National Centre for Cell Science,  
109 Pune, India and the NTERA-2 CLD1 cells were purchased from ATCC, USA. The cancer  
110 cells were cultured in media containing DMEM supplemented with 10% fetal bovine serum  
111 (Cat. No. RM9955) (all from Hi-Media Laboratories, India), 1% Penicillin and Streptomycin,  
112 GlutaMAX, CSCs and NTERA -2 cells were supplemented with non-essential amino acids,  
113 sodium pyruvate, and 0.1% of 2-mercaptoethanol (all from Gibco Thermo Fisher Scientific,  
114 USA). The cells were grown in incubator with 5% CO<sub>2</sub> with humidified atmosphere. The  
115 cells were trypsinized upon reaching 75–80% confluency using 0.25% trypsin-EDTA  
116 (Thermo Fisher Scientific, USA).

### 117 **2.2 Immunophenotyping by flow cytometry:**

118 For analytical flow cytometry (immunophenotyping), the bCSCs were fixed with 4% PFA  
119 and permeabilized with 0.3% Triton X-100. Cells were then incubated with the fluorescently  
120 tagged antibody (CD44 and CD24) for 1 hour. Then the cells were given PBS wash and  
121 acquired on guava EasyCyte flow cytometer (10,000 events). Obtained data were analyzed  
122 using DE Novo FCS Express 5 software, USA (antibody details are available in  
123 Supplementary Table-1).

### 124 **2.3 Migration assay:**

125 Sorted and MDA MB 468 CSC, and the WT cells were seeded in a 6-well plate. After  
126 reaching 80% confluency, the cell monolayer was scraped/scratch using a 100µl pipette tip.  
127 The cells were washed with PBS to remove all single cells. Phase-contrast images (10X



128 magnifications) were captured after 24h of the scratch for two cell types. Percentage cell  
129 migration was calculated by measuring the distance between the scratches comparing the  
130 final gap width to the initial gap width at Time T0 (zero) using Image-J software. Covered  
131 area was calculated in 5 random fields and represented as percentage of area covered.  
132 Experiments were performed in triplicate.

#### 133 **2.4 Mammosphere assay:**

134 Sorted and MDA MB 468 CSC and the WT cells were harvested by trypsinization. Cells  
135 were counted and around 800 cells per 20 $\mu$ l drops were kept as hanging drops on the lid of  
136 100mm dish at 37°C under humidified conditions. 3D mammosphere of 200-250 $\mu$ m (average  
137 diameter) size were formed at the end of 48h for all the four cell types. At the end of four  
138 days (96h), mammospheres were collected and observed under the microscope (Primovert  
139 inverted microscope from CARL ZEISS) and images were captured. Relative area, roundness  
140 score and solidity of 3D mammosphere were calculated using Image-J software.

#### 141 **2.5 Immunocytochemistry assay:**

142 The cells were cultured on 8 well chamber slides in 70% confluency followed by fixing using  
143 4% paraformaldehyde (PFA) and permeabilization with 0.3% Triton X-100 (Sigma) in PBS.  
144 The non-specific binding sites were blocked with 5% fetal bovine serum in PBS (Himedia  
145 Laboratories, India) for 1 hour. Cells were then incubated with primary antibodies overnight  
146 at 4°C, followed by the appropriate secondary antibody for 1 hour, counterstained with DAPI  
147 for 10 minutes. Finally, the slides were mounted with Prolonged Glass Antifade (Thermo  
148 Fisher, USA). The slides were observed, and images were captured under a ZOE Fluorescent  
149 cell imager (Bio-Rad, USA). The details of the antibodies are provided in (Supplementary  
150 table-1).

#### 151 **2.6 Gene expression study by qRT-PCR:**

152 One million ( $1 \times 10^6$ ) cells were used to isolate RNA using TRIzol reagent (15596026,  
153 Thermo Scientific, USA) as per the manufacturer's instructions. Quantification of RNA was  
154 done by using a Colibri Micro volume Spectrometer (Titertek-Berthold, Germany). 1 $\mu$ g of  
155 RNA was reverse transcribed to cDNA using iSCRIPT™ cDNA synthesis kit (Bio-Rad  
156 Catalog Number-1708891), and qRT-PCR reactions were performed using SSO-Fast™ Eva  
157 Green Supermix (Bio-Rad, USA) as per the manufacturer's instructions. The individual  
158 mRNA expressions of the tested genes of all the cell types (Ct values) were first normalized  
159 with their respective GAPDH values for getting the  $\delta$ Ct values. Finally, the respective mRNA

160 expressions were represented as fold change. The primer sequences were designed by the  
161 authors (Sigma, United States). The details of primers are provided in (Supplementary table-  
162 2)

### 163 **2.7 siRNA transfection:**

164 For transfection experiments,  $0.5 \times 10^6$  cells were plated in a 6-well plate and allowed to reach  
165 75% confluency. Cells were transfected with 10nM of anti-Oct-4 siRNA and  
166 scrambled/control (10 nM) siRNA. D1X cationic lipid-based formulation (developed in  
167 CSIR-IICT, Hyderabad) was used as a potent siRNA transfection reagent instead of the  
168 commercially available transfection reagents such as lipofectamine or fugene, in the presence  
169 of serum containing media as described previously (Rachamalla et al., 2019). After 16h  
170 incubation at 37°C 5% CO<sub>2</sub>, the media was changed, and transfection was confirmed by  
171 fluorescence microscopy. Other experiments for validation were done simultaneously. We  
172 had initially transfected the Cy5 labelled scrambled siRNA using the lipid-based gene  
173 delivery system (D1X) to determine the transfection efficiency which was 100% as assessed  
174 using the confocal microscopy.

### 175 **2.8 Annexin-V-FITC assay:**

176 Cancer stem cells (0.5 million) control and transfected with siRNA were washed with ice  
177 cold PBS and resuspended in annexin-V binding buffer. Cells were incubated with annexin-V  
178 conjugated to FITC antibody (Thermo Fisher Scientific, USA) and propidium iodide (PI) for  
179 15 min in dark. Further, the cells were washed and resuspended in annexin-V binding buffer.  
180 Cells (10,000 events) were acquired using Guava EasyCyte Flow Cytometer (Millipore  
181 Sigma, USA) data analysis was carried out by using DE Novo FCS Express 5 software, USA.

182 **2.9 Molecular modelling to study Oct-4 and Vitamin C interactions: Development of**  
183 **protein structure:** Protein target Oct-4 structure was downloaded from database Protein  
184 Data Bank (PDB) (OCT-4. PDB). Vitamin C structure was downloaded from Pub Chem.  
185 (Pub Chem ID54670067) in .sdf format. Conversion of Ligand i.e., Vitamin C from .sdf  
186 format to .pdb format was done by using Open Babel (version 2.4.1). Hydrogen atoms and  
187 Kollman charges (7.0) were added to the protein by AutoDock MGL-Tool version 1.5.6 and  
188 saved as PDBQT file. Hydrogen atoms, Gasteiger charges were added to ligand and were  
189 saved in PDBQT format.

190 **Protein ligand Interaction:** Vitamin C was docked with Oct-4 using Auto Dock 4.2.6. Grid  
191 box was obtained by taking inside the entire protein structure (blind docking method). The

192 grid box size maintained in configuration was  $36\text{\AA} \times 30\text{\AA} \times 48\text{\AA}$  and centre was 57.908,  
193 0.508, and 3.182. All the information like exhaustiveness, coordinates size of grid box was  
194 saved in .txt file and assigning the docking report in an out. pdbqt file. Ligand was aligned  
195 with protein molecule and analysed for different binding interactions and interacting residues  
196 using PyMol. The main purpose of this experiment is to study the mode of interactions and  
197 binding site of Vitamin C with Oct-4.

## 198 **2.10 Statistical analysis:**

199 All the experiments were carried as biological and technical triplicates and results have been  
200 represented as mean  $\pm$  SD. The differences between more than two groups were analysed by  
201 one way analysis of variance (ANOVA) followed by Bonferroni post-hoc test and between  
202 two groups student t-test was used. The P values of  $P \leq 0.05$  (\*) and  $P \leq 0.01$  (\*\*),  $P \leq 0.001$   
203 (\*\*\*) were considered as significant. Error bar represents the  $\pm$  standard error of mean.

## 204 **3. Results:**

### 205 **3.1 CD44<sup>+</sup>/24<sup>-</sup> bCSCs expressed EMT genes, exhibited mammosphere forming abilities:**

206 CD44 is considered a potential CSC marker in most cancers, and CD24 is another vital  
207 marker whose prognostic value and significance are investigated in combination with CD44  
208 in various cancers, including breast cancer. By using fluorescent activated cells sorting  
209 CD44<sup>+</sup>/24<sup>-</sup> CSCs were isolated from the heterogeneous TNBC cell line MDA MB 468.  
210 Almost, 61.70% of the pure CSC population were isolated and utilized in all the further  
211 experiments (Fig. 1A). Gene expression of the CD44<sup>+</sup>/24<sup>-</sup> CSCs was performed by qRT-PCR,  
212 the results indicated significant expression (2.5-fold) of stem cell marker CD44 (up-  
213 regulation) and CD24 (down-regulation). Less expression of EMT marker such as EpCAM  
214 was observed in MDA MB 468 CSCs. The qRT-PCR analysis results also showed up-  
215 regulation of metastatic MMP-2, angiogenesis marker SP-1, proliferative marker AKT,  
216 perhaps indicating EMT in concordance with increased stemness metastatic nature of CSCs  
217 as compared to WT or heterogeneous population (Fig. 1F).

218 In order to test the intrinsic mammosphere forming potential of CD44<sup>+</sup>/24<sup>-</sup> bCSCs, the  
219 mammosphere assay was performed. The mammosphere formed by bCSC were bigger in size  
220 and numbers compared to the WT populations (Fig. 1B). The 2D images of the  
221 mammospheres upon analysis, exhibited relatively large area ( $0.570 \text{ mm}^2$ ) from CSC as  
222 compared that of the mammospheres from WT cells ( $0.481 \text{ mm}^2$ ) (Fig.1C). Furthermore,  
223 higher percentage roundness score from CSCs (80%) mammosphere was observed when

224 compared to mammospheres derived from the WT cells (40%) (Fig.1C). These results  
225 validated the CSC subpopulation of MDA MB 468, for their self-renewal capacity. In other  
226 words, the sorted CSC subpopulation demonstrated more stemness, as compared to, the WT/  
227 parent population.

### 228 **3.2 CD44<sup>+</sup>/24<sup>-</sup> bCSC population exhibited migratory properties and expression of** 229 **pluripotent stem cell markers**

230 To validate an in vitro relevance of the migration or metastasis, wound healing assay was  
231 performed on CSC populations MDA MB 468 cell line. After 24 hours of the scratch, the  
232 distance covered by the cells was highest in the CD44<sup>+</sup>/24<sup>-</sup> CSCs and less in the WT  
233 population (Fig. 1D) indicating a faster migration potential of bCSCs. The percentage of CSC  
234 invading the scratch space was more than 80% in MDA MB 468 when compared to WT  
235 control (60%) after 24h (Fig.1E).

236 The stem cell properties of CSCs were also reflected in immunocytochemistry (ICC)  
237 analysis. ICC showed that the pluripotent stem cell markers such as Oct-4, Sox-2, Nanog,  
238 expression was significantly higher in the CD44<sup>+</sup>/24<sup>-</sup> bCSCs than the WT/unsorted cells (Fig.  
239 2A and B). The sorted cell types also expressed vimentin suggesting the fact that CSC-like  
240 property co-exists with EMT phenotype in bCSC (Wang et al., 2014) (Fig. 2A and B). We  
241 have confirmed the pluripotency markers with the positive control NTERA-2 CLD1 cells  
242 (Fig. 2C), and compared the expression with the CSCs (Fig. 2D). These results confirmed that  
243 the CD44<sup>+</sup>/24<sup>-</sup> population exhibits CSC characteristics in conjunction with EMT phenotype.

### 244 **3.3 Oct-4 plays crucial role in CSCs sustenance and mammosphere formation:**

245 Oct-4 is an anti-apoptotic factor and presents itself abundantly in the CSCs to save the cells  
246 from programmed cell death (Wang et al., 2013). To assess the importance of the Oct-4 in  
247 bCSCs, the Oct-4 was knocked-down using Oct-4 siRNA. When the bCSCs were transfected  
248 with the Oct-4 siRNA, as shown in figure-3, the expression level decreased after 16h of  
249 transfection (Fig. 3C). Further, the expression level was verified using analytical flow  
250 cytometry. In the scrambled sample, 65.23% (Fig.3C) of the cells expressed Oct-4 protein  
251 when compared with cells transfected with the Oct-4 siRNA which exhibited only 6-13%  
252 (Fig. 3C) of Oct-4 expression. This assay validated the transfection efficiency and  
253 downregulation of the Oct-4 expression in bCSCs. Moreover, morphological changes were  
254 observed in bCSCs of MDA MB 468 cells after 16 hours post-transfection (Fig.3B). No  
255 morphological changes were observed in the cells transfected with Cy5 labelled scrambled

256 siRNA. As Oct-4 has been reported as an anti-apoptotic agent, we hypothesized that siRNA  
257 mediated Oct-4 knockdown might induce CSCs apoptosis that was further established by  
258 annexin-V expression in the Oct4 knock-down bCSCs (Fig. 3G and H). In summary, knock-  
259 down of Oct-4 caused morphological changes along with apoptotic cell-death in bCSCs.

260 We next sought to explore the role of Oct-4 in mammosphere formation. As shown in figure  
261 3D, the appearance of the tumour/mammosphere was disrupted in the transfected samples  
262 compared to the scrambled sample (Fig. 3D). Both the sphere roundness and the compactness  
263 were significantly reduced in the mammospheres formed from si-RNA-Oct4 transfected  
264 bCSCs, as compared to, the scrambled transfected bCSCs (Fig. 3D and 3F). Here, 1.5  $\mu$ M  
265 Doxorubicin was used to obtain a positive inhibition of the mammosphere formation. Taken  
266 together, the knock-down of Oct-4 caused inhibition of mammosphere formation in bCSCs  
267 (Fig. 3D).

268

### 269 **3.4 Vitamin C directly interacts with bCSCs by down regulation of the pluripotency** 270 **factor Oct-4**

271 As shown in figure 4A, the bCSCs/CD44<sup>+</sup>24<sup>-</sup> population when subjected to treated with  
272 Vitamin C (10 mM) for 2h, exhibited down-regulation of Oct-4 (Fig. 4A). In the untreated  
273 control, the Oct-4 expression was 91.99% in CSCs (Fig. 4A). Interestingly, after Vitamin C  
274 treatment, the expression reduced drastically to 3.65% in bCSCs (Figure 4A). As we have  
275 mentioned earlier (Sen, Shenoy & Bose et al., 2017, Sen et al., 2020), Vitamin C is  
276 responsible for cellular damage, apoptosis, and inhibition of cell proliferation Here we have,  
277 observed the down-regulation of the pluripotency-regulating octamer-binding transcription  
278 factor (Oct-4) expression upon treatment with Vitamin C for 2h (Fig.4B). Based on the  
279 above-mentioned findings, we hypothesized a co-relation/possible interaction between Oct-4  
280 and Vitamin C worth validation.

281 To further understand the possible interaction between the Oct-4 and Vitamin C, Auto dock  
282 vina was used to investigate the binding sites and type of interactions occurring between  
283 Vitamin C and Oct-4 protein. Vitamin C – Oct-4 complexes were analysed using the  
284 molecular (blind) docking approach. Out of nine different predicted conformations for  
285 Vitamin C–Oct-4, top three ligand conformations having minimum binding energies were  
286 considered. The top minimum energies were as mentioned **-5.1, -5.0** and **-4.9 Kcal mol<sup>-1</sup>**  
287 respectively. All the structural or binding parameters are summarized in Table 1. These

288 results predicted that Vitamin C binds with Oct-4 mainly in beta position of K9 to K11  
289 sequences. The major type of interaction between Vitamin C and Oct-4 is hydrogen bond  
290 between hydroxyl groups of the ligand to the oxygen or nitrogen atoms of amino acid main  
291 chain of the protein. The number of hydrogen bonds found for all the three different positions  
292 were seen in PyMol as shown in Fig. -4C-G.

### 293 **Discussion:**

294 Octamer-binding transcription factor 4 (Oct-4), a homeodomain transcription factor of the  
295 Pit-Oct-Unc (POU) family, is considered to play an essential role in the self-renewal  
296 epithelial-mesenchymal transition (EMT) (Zeineddine et al., 2014) and drug resistance  
297 development of CSCs and breast cancer metastasis (Wang et al., 2014). Oct-4 is abundantly  
298 proved as one of the most significant transcription factors that control self-renewal and  
299 pluripotency of pluripotent stem cells and malignant tumour succession and differentiation in  
300 CSCs (Wu & Schöler 2014). Hence, Oct-4 could be one of the critical factors that target stem  
301 cell-specific cancer therapeutics.

302 Breast cancer, which is now a frequently detected type of cancer, is still one of the most  
303 lethal malignancies despite recent advances in early detection and therapy (Bose et al., 2018).  
304 Conventional therapies such as immune, chemo, and radiotherapy, can target breast cancer  
305 cells. However, conventional therapies are often unaffordable and toxic to the patients  
306 (Keegan et al., 2012; Arruebo et al., 2011). Hence, certain alternatives/additives to  
307 conventional therapies such as oral supplements, nutraceuticals, and antioxidants might  
308 provide a better quality of life and the mitigation of the disease burden in breast cancer  
309 patients (Lopes, Dourado & Oliveira et al., 2017). CSCs play critical roles in regulating tumour  
310 initiation, relapse, and chemoresistance, and hence such processes must be disrupted as  
311 therapeutic strategies (Lopes, Dourado & Oliveira et al., 2017). In the current study, we have  
312 used the MDA MB 468 cell line as an in vitro TNBC model and isolated the CSCs based  
313 upon the surface markers  $CD44^{+}/24^{-}$ . The  $CD44^{+}/24^{-}$  CSCs were further characterized for the  
314 validation of the CSC phenotype. We obtained a high expression of Oct-4 in the cancer CSC  
315 population by IF and flow-cytometric analysis (94%). Moreover, detection of Oct-4 in  
316 metastatic cancer cells and tissues indicates its enrichment CSCs (Kim, & Nam 2011)..  
317 Considerable uncertainties and controversies persist, and only a few studies have been  
318 reported attempting to target Oct-4 directly (Wang et al., 2015). According to the available  
319 reports, inhibition of Oct-4 effectively suppressed the propagation of human embryonal



320 carcinoma cells and triggered their apoptotic death (Kim, & Nam 2011). This current study  
321 additionally talks about the dependence of bCSC on Oct-4 for their survival/ sustenance.

322 Nevertheless, our results indicate a negative co-relation between Oct 4 expression and  
323 apoptosis. Oct-4 is also known as an anti-apoptotic protein; hence repression of Oct-4 can  
324 cause apoptosis in breast cancer (Phi et al., 2018). This current study added to the growing  
325 evidence on the previous study's conclusion wherein we demonstrated the cellular apoptosis  
326 of bCSCs upon Oct-4 knock-down. Furthermore, in this work, we have demonstrated the  
327 morphological changes and disruption of mammosphere formation of bCSCs upon si-RNA  
328 mediated Oct-4 knock-down in vitro. Thus, depending on the cellular contexts, restraining  
329 Oct-4 by siRNA may activate or inactivate its downstream counterparts, resulting in  
330 significant apoptosis in bCSCs, resulting in therapeutic outcomes. (Kristensen et al., 2010).  
331 Previous reports attributed the inhibition of Oct-4 to effectively suppress the propagation of  
332 human embryonal carcinoma cells and triggered their apoptotic death (Phi et al., 2018). This  
333 study established that Vitamin C in bCSC downregulates the Oct-4 expression, further  
334 leading to apoptosis as it is known that the Vitamin C increases cellular ROS levels. The  
335 interaction between Vitamin C and Oct-4 was finally confirmed by in Silico docking, which  
336 added novel information in the literature.

337 Moreover, we anticipate that Oct-4 knockout by CRISPR-Cas9 technology may attain a  
338 higher degree of inhibition on cell propagation than si-Oct-4 in bCSCs (Phi et al., 2018).  
339 Targeting major markers are known in the literature, where CD44 was knocked down in the  
340 bCSCs and reported the reduced stem ness of the bCSC, as a promising breast cancer therapy  
341 approach (Pham et al., 2011). Although, the abundant markers such as CD44, depletion of  
342 CD44 in other tissue can cause secondary damage, which can finally lead to failure in cancer  
343 therapy. Hence, the cancer specific therapy will be more promising. Such a strategy may help  
344 tackle the significant challenges in treating human cancers, which is worth exploring in next  
345 step. When specificity and comes, strategies like micro-RNA (miRNA) is one of the crucial  
346 components for the breast cancer prognosis (Ko et al.,2020). We established an essential  
347 proof-of-concept that inhibiting cancer-specific Oct-4 can effectively target CSCs and the  
348 entire bulk of cancer cells (Li et al., 2017). We, hence, propose down-regulation of Oct-4 first  
349 at a pre-clinical level in tumour xenograft animal models followed by possible clinical trials  
350 using either RNAi or CRISPR-Cas9 approaches.

351

352 **Conclusion:**

353 This study depicts the role of Oct-4 in the sustenance of the bCSCs. Oct-4 is, hence, one of  
354 the essential cancer-specific transcription factors; which gets downregulated upon treatment  
355 with Vitamin C leading to cellular apoptosis. in bCSCs. Further, we established the  
356 interaction between the Oct-4 and Vitamin C by the in-silico chemical docking technique. In  
357 addition, Oct-4 could be the best candidate target for future breast cancer therapeutics for its  
358 unique abundance in metastatic cancer and its contribution to its sustenance. Finally, the  
359 molecule Oct-4 can be a promising therapeutic target to improvise the lives of numerous  
360 breast cancer patients.

361

362 **Funding and Acknowledgements:**

363 The authors would like to thank Indian Council of Medical Research (ICMR) for providing  
364 the senior research fellowship to Mr Utsav Sen (Ph.D. scholar) [ICMR-2017-  
365 3769/CMB/BMS]. HKR thanks Council of Scientific & Industrial Research, Govt. of India  
366 for his doctoral fellowship. Authors also thank the Yenepoya Research Centre, Yenepoya  
367 (Deemed to be University) Mangalore for its infrastructural and administrative support for  
368 conducting this research. This is IICT communication number IICT/Pubs./2021/125

369

370 **Author contribution:**

371 US designed and performed the experiments, analysed, interpreted data, and wrote the initial  
372 manuscript, and prepared the figures; SS and MN carried out the experiment required in the  
373 revision of the manuscript, AG carried out in silico docking and its data interpretation; HKR  
374 developed the lipid transfection reagent and helped in siRNA experiment. RB provided his  
375 valuable inputs in the entire manuscript, provided cationic lipid delivery system, reviewed and  
376 approved the manuscript; SS and BB directed the project, involved in designing experiments  
377 and analysis of data, wrote and approved the manuscript.

378 **7. Supporting information:**

379 Additional tables and information can be found in the Supporting information section.

380 **8. Conflict of interest:**

381 There is no conflict of interest among the authors.



## 9. References:

1. Arruebo M, Vilaboa N, Sáez-Gutierrez B, Lambea J, Tres A, Valladares M, González-Fernández Á (2011). Assessment of the evolution of cancer treatment therapies. *Cancers*. 3(3):3279-330. DOI: 10.3390/cancers3033279
2. Bose B, Sen U, Shenoy PS (2018). Breast Cancer Stem Cell Therapeutics, Multiple Strategies Versus Using Engineered Mesenchymal Stem Cells with Notch Inhibitory Properties: Possibilities and Perspectives. *Journal of cellular biochemistry*. 119(1):141-9. DOI: 10.1002/jcb.26196
3. Collina F, Di Bonito M, Li Bergolis V, De Laurentiis M, Vitagliano C, Cerrone M, Nuzzo F, Cantile M, Botti G (2015). Prognostic value of cancer stem cells markers in triple-negative breast cancer. *BioMed research international*. DOI: 10.1155/2015/158682
4. Das A, Dhar K, Maity G, Sarkar S, Ghosh A, Haque I, Dhar G, Banerjee S, Banerjee SK (2017). Deficiency of CCN5/WISP-2-Driven Program in breast cancer Promotes Cancer Epithelial cells to mesenchymal stem cells and Breast Cancer growth. *Scientific reports*. 27:7(1):1-3. Doi: 10.1038/s41598-017-00916-z
5. Denisenko TV, Gorbunova AS, Zhivotovsky B (2019). Mitochondrial involvement in migration, invasion and metastasis. *Frontiers in cell and developmental biology*. 20; 7:355. DOI: 10.3389/fcell.2019.00355
6. Fabregat I, Malfettone A, Soukupova J (2016). New insights into the crossroads between EMT and stemness in the context of cancer. *Journal of clinical medicine*. 5(3):37. DOI: 10.3390/jcm5030037
7. Fares J, Fares MY, Khachfe HH, Salhab HA, Fares Y (2020). Molecular principles of metastasis: a hallmark of cancer revisited. *Signal transduction and targeted therapy*. 12;5(1):1-7. DOI: 10.1038/s41392-020-0134-x
8. Harbeck N, Penault-Llorca F, Cortes J, Gnant M, Houssami N, Poortmans P, Ruddy K, Tsang J, Cardoso F (2019). Breast cancer (Primer) *Nat. Rev. Dis. Primers*.66. DOI: 10.1038/s41572-019-0111-2
9. Keegan TH, DeRouen MC, Press DJ, Kurian AW, Clarke CA (2012). Occurrence of breast cancer subtypes in adolescent and young adult women. *Breast Cancer Research*. (2):1-9. DOI: 10.1186/bcr3156
10. Kim RJ & Nam JS (2011). OCT4 expression enhances features of cancer stem cells in a mouse model of breast cancer. *Laboratory animal research*. 27(2):147-52. DOI: 10.5625/lar.2011.27.2.147

11. Ko CCH, Chia WK, Selvarajah GT, Cheah YK, Wong YP, & Tan GC. (2020). The role of breast cancer stem cell-related biomarkers as prognostic factors. *Diagnostics*, 10(9), 721. Doi:10.3390/diagnostics10090721
12. Kristensen DM, Nielsen JE, Kalisz M, Dalgaard MD, Audouze K, Larsen ME, Jacobsen GK, Horn T, Brunak S, Skakkebaek NE, Leffers H (2010). OCT4 and downstream factors are expressed in human somatic urogenital epithelia and in culture of epididymal spheres. *Molecular human reproduction*. 1;16(11):835-45. DOI: 10.1093/molehr/gaq008
13. Li W, Zhou Y, Zhang X, Yang Y, Dan S, Su T, She S, Dong W, Zhao Q, Jia J, Yao H (2017). Dual inhibiting OCT4 and AKT potently suppresses the propagation of human cancer cells. *Scientific reports*. 6;7(1):1-2. DOI: 10.1038/srep46246
14. Liu A, Yu X, Liu S (2013). Pluripotency transcription factors and cancer stem cells: small genes make a big difference. *Chinese journal of cancer*. 32(9):483. DOI: 10.5732/cjc.012.10282
15. Loh CY, Chai JY, Tang TF, Wong WF, Sethi G, Shanmugam MK, Chong PP, Looi CY (2019). The E-cadherin and N-cadherin switch in epithelial-to-mesenchymal transition: signaling, therapeutic implications, and challenges. *Cells*. 8(10):1118. DOI: 10.3390/cells8101118
16. Lopes CM, Dourado A, Oliveira R (2017). Phytotherapy and nutritional supplements on breast cancer. *BioMed research international*. DOI: 10.1155/2017/7207983
17. Lu W, & Kang Y (2019). Epithelial-mesenchymal plasticity in cancer progression and metastasis. *Developmental cell*, 49(3), 361-374. DOI: 10.1016/j.devcel.2019.04.010
18. Mattina J, MacKinnon N, Henderson VC, Fergusson D, Kimmelman J (2016). Design and reporting of targeted anticancer preclinical studies: a meta-analysis of animal studies investigating sorafenib antitumor efficacy. *Cancer research*, 15;76(16):4627-36. DOI: 10.1158/0008-5472.CAN-15-3455
19. Pham PV, Phan NL, Nguyen NT, Truong NH, Duong TT, Le DV, Truong KD, Phan NK (2011). Differentiation of breast cancer stem cells by knockdown of CD44: promising differentiation therapy. *Journal of translational medicine*. Dec;9(1):1-3. DOI: 10.3390/diagnostics10090721
20. Phi LT, Sari IN, Yang YG, Lee SH, Jun N, Kim KS, Lee YK, Kwon HY (2018). Cancer stem cells (CSCs) in drug resistance and their therapeutic implications in cancer treatment. *Stem cells international*. DOI: 10.1155/2018/5416923
21. Rachamalla HK, Mondal SK, Deshpande SS, Sridharan K, Javaji K, Jaggarapu MM, Jinka S, Bollu V, Misra S, Banerjee R (2019). Efficient anti-tumor nano-lipoplexes with

- unsaturated or saturated lipid induce differential genotoxic effects in mice. *Nanotoxicology*. 21;13(9):1161-75. DOI: 10.1080/17435390.2019.1643049
22. Radosa JC, Eaton A, Stempel M, Khander A, Liedtke C, Solomayer EF, Karsten M, Pilewskie M, Morrow M, King TA (2017). Evaluation of local and distant recurrence patterns in patients with triple-negative breast cancer according to age. *Annals of surgical oncology*. 24(3):698-704. DOI: 10.1245/s10434-016-5631-3
  23. Saadin K, White IM (2013). Breast cancer stem cell enrichment and isolation by mammosphere culture and its potential diagnostic applications. *Expert review of molecular diagnostics*. 1;13(1):49-60. DOI: 10.1586/erm.12.117
  24. Schirmacher V (2019). From chemotherapy to biological therapy: A review of novel concepts to reduce the side effects of systemic cancer treatment. *International journal of oncology*. 1;54(2):407-19. DOI: 10.3892/ijo.2018.4661
  25. Sen U, Chaudhury D, Shenoy P S, Bose B (2021). Differential sensitivities of triple-negative breast cancer stem cell towards various doses of vitamin C: An insight into the internal antioxidant systems. *Journal of Cellular Biochemistry*. 122(3-4):349-66. DOI: 10.1002/jcb.29863
  26. Wang D, Lu P, Zhang H, Luo M, Zhang X, Wei X, Gao J, Zhao Z, Liu C (2014). Oct-4 and Nanog promote the epithelial-mesenchymal transition of breast cancer stem cells and are associated with poor prognosis in breast cancer patients. *Oncotarget*. 5(21):10803. DOI: 10.18632/oncotarget.2506
  27. Wang YD, Cai N, Wu XL, Cao HZ, Xie LL, Zheng PS (2013). OCT4 promotes tumorigenesis and inhibits apoptosis of cervical cancer cells by miR-125b/BAK1 pathway. *Cell death & disease*. 4(8):e760. DOI: 10.1038/cddis.2013.272
  28. Wang YJ & Herlyn M (2015). The emerging roles of Oct4 in tumor-initiating cells. *American Journal of Physiology-Cell Physiology*. 1;309(11):C709-18. DOI: 10.1152/ajpcell.00212.2015
  29. Wu G & Schöler HR (2014). Role of Oct4 in the early embryo development. *Cell Regeneration*. 3(1):1-0. DOI: 10.1186/2045-9769-3-7
  30. Yang L, Shi P, Zhao G, Xu J, Peng W, Zhang J, Zhang G, Wang X, Dong Z, Chen F, Cui H (2020). Targeting cancer stem cell pathways for cancer therapy. *Signal transduction and targeted therapy*. 7;5(1):1-35. DOI: 10.1038/s41392-020-0110-5
  31. Yin L, Duan JJ, Bian XW, Yu SC (2020). Triple-negative breast cancer molecular subtyping and treatment progress. *Breast Cancer Research*. 22(1):1-3. DOI: 10.1186/s13058-020-01296-5

32. Zeineddine D, Abou Hammoud A, Mortada M, Boeuf H (2014). The Oct4 protein: more than a magic stemness marker. *American journal of stem cells*. 3(2):74.

382 **10. Figure Legends:**

383 **Figure-1: CD44<sup>+</sup>/24<sup>-</sup> bCSCs from MDA MB 468 TNBC line exhibited CSC phenotype**

384 A) Work flow for the entire work B) FACS sorting of CSCs as CD44<sup>+</sup> and CD24<sup>-</sup> cells from  
385 MDA MB 468. C) and E) Comparative gene expression analysis of both CSCs and WT  
386 population from MDA MB468 cells. D) Formation of mammosphere by both Wt. and CSC  
387 population F) Quantitative readout of Mammosphere formation by the TNBCs. G) and H)  
388 Scratch assay / migration assay results and graphical representation of the data. Scale bar =  
389 100µm. The differences between the two groups were analysed by student t-test. The P  
390 values of >0.12 (ns), 0.033(\*), 0.002(\*\*), <0.0002(\*\*\*) were considered as significant. Error  
391 bar represents the ± standard error of mean.

392 **Figure-2: CD44<sup>+</sup>/24<sup>-</sup> bCSCs from MDA MB 468 TNBC line expressed pluripotency**  
393 **related protein.** A) and B) Immunocytochemistry of WT and CSC population from MDAMB  
394 468 line. C) Pluripotency marker expression in NTERA-2 CLD1 pluripotent embryonal  
395 carcinoma cell line. D) is the graphical representation of the expression of the percentage of  
396 the cells expressing pluripotency marker compared to NTERA-2. Scale bar = 50/100µm. The  
397 differences between more than two groups were analysed by one way ANOVA followed by  
398 Bonferroni's post-hoc test. The P values of >0.12 (ns), 0.033(\*), 0.002(\*\*), <0.0002(\*\*\*)  
399 were considered as significant. Error bar represents the ± standard error of mean.

400 **Figure 3: Inhibition of Oct-4 expression prevaricates bCSC survival**

401 A) Confocal images of the MDA MB 468 CSCs after transfected with the Cy5 labelled  
402 scrambled siRNA. The Images were captured 16h post-transfection. B) Morphological  
403 changes in bCSCs after Oct-4 siRNA transfection C) mRNA expression level of Oct-4 after  
404 transfection in mDA-MB-468 sample, compared with the scrambled and siRNA transfected  
405 samples D) Analytical flowcytometry result showing the Oct-4 expression before and after  
406 transfection. E) Are the representative images obtained from the mammosphere assay after  
407 Oct-4 siRNA transfection and scrambled siRNA (Doxorubicin was used as positive control).  
408 F) and G) are the direct read out and representation of mammosphere assay. H) Flow  
409 cytometry analysis of the Annexin V expression before and after Oct-4 siRNA expression in

410 bCSCs of MDA MB 468 cells, also after treatment with the Vitamin C. D) graphical  
411 representation of the percentage of apoptotic cells. Scale bar = 10, 20 and 100 $\mu$ m. The  
412 differences between the two groups were analysed by student t-test and more than two groups  
413 were analysed by one way ANOVA, followed by Bonferroni's post-hoc test. The P values of  
414 >0.12 (ns), 0.033(\*), 0.002(\*\*), <0.0002(\*\*\*) were considered as significant. Error bar  
415 represents the  $\pm$  standard error of mean.

416

#### 417 **Figure 4: Vitamin C could be a potential target for the Oct-4**

418 Flow cytometry data representation of the Oct-4 expression before and after Vitamin C  
419 treatment (10mM). B) graphical representation of the flow data. C)-G) Possible interaction of  
420 Vitamin C and Oct-4 protein by *in sillico* docking technique.

421

#### 422 **Figure 5: Schematic representation of the work and the possible mechanism of action** 423 **after Oct-4 knockdown in bCSCs.**

424 Oct-4 is very crucial for cell proliferation and sustenance and even for the aggressiveness of  
425 cancer. And this unique pluripotent transcription factor is only expressed in ESCs and CSCs.  
426 When this transcription factor was knocked down with siRNA, the cellular process altered  
427 drastically. The bCSCs morphology was changed, the cells were undergoing apoptosis; it was  
428 also found the expression of Oct-4 was downregulated. Most interestingly, Oct-4 knockdown  
429 not only influenced the cellular sustenance but also affected tumour formation ability. It was  
430 previously reported the Vitamin C causes apoptosis in bCSCs, and here we have shown that  
431 Vitamin C also interacts with Oct 4 by flow cytometry and sillico docking. In summary, Oct-4  
432 can be a potential target for the CSC-based therapeutic maneuvering for breast cancer  
433 treatment.

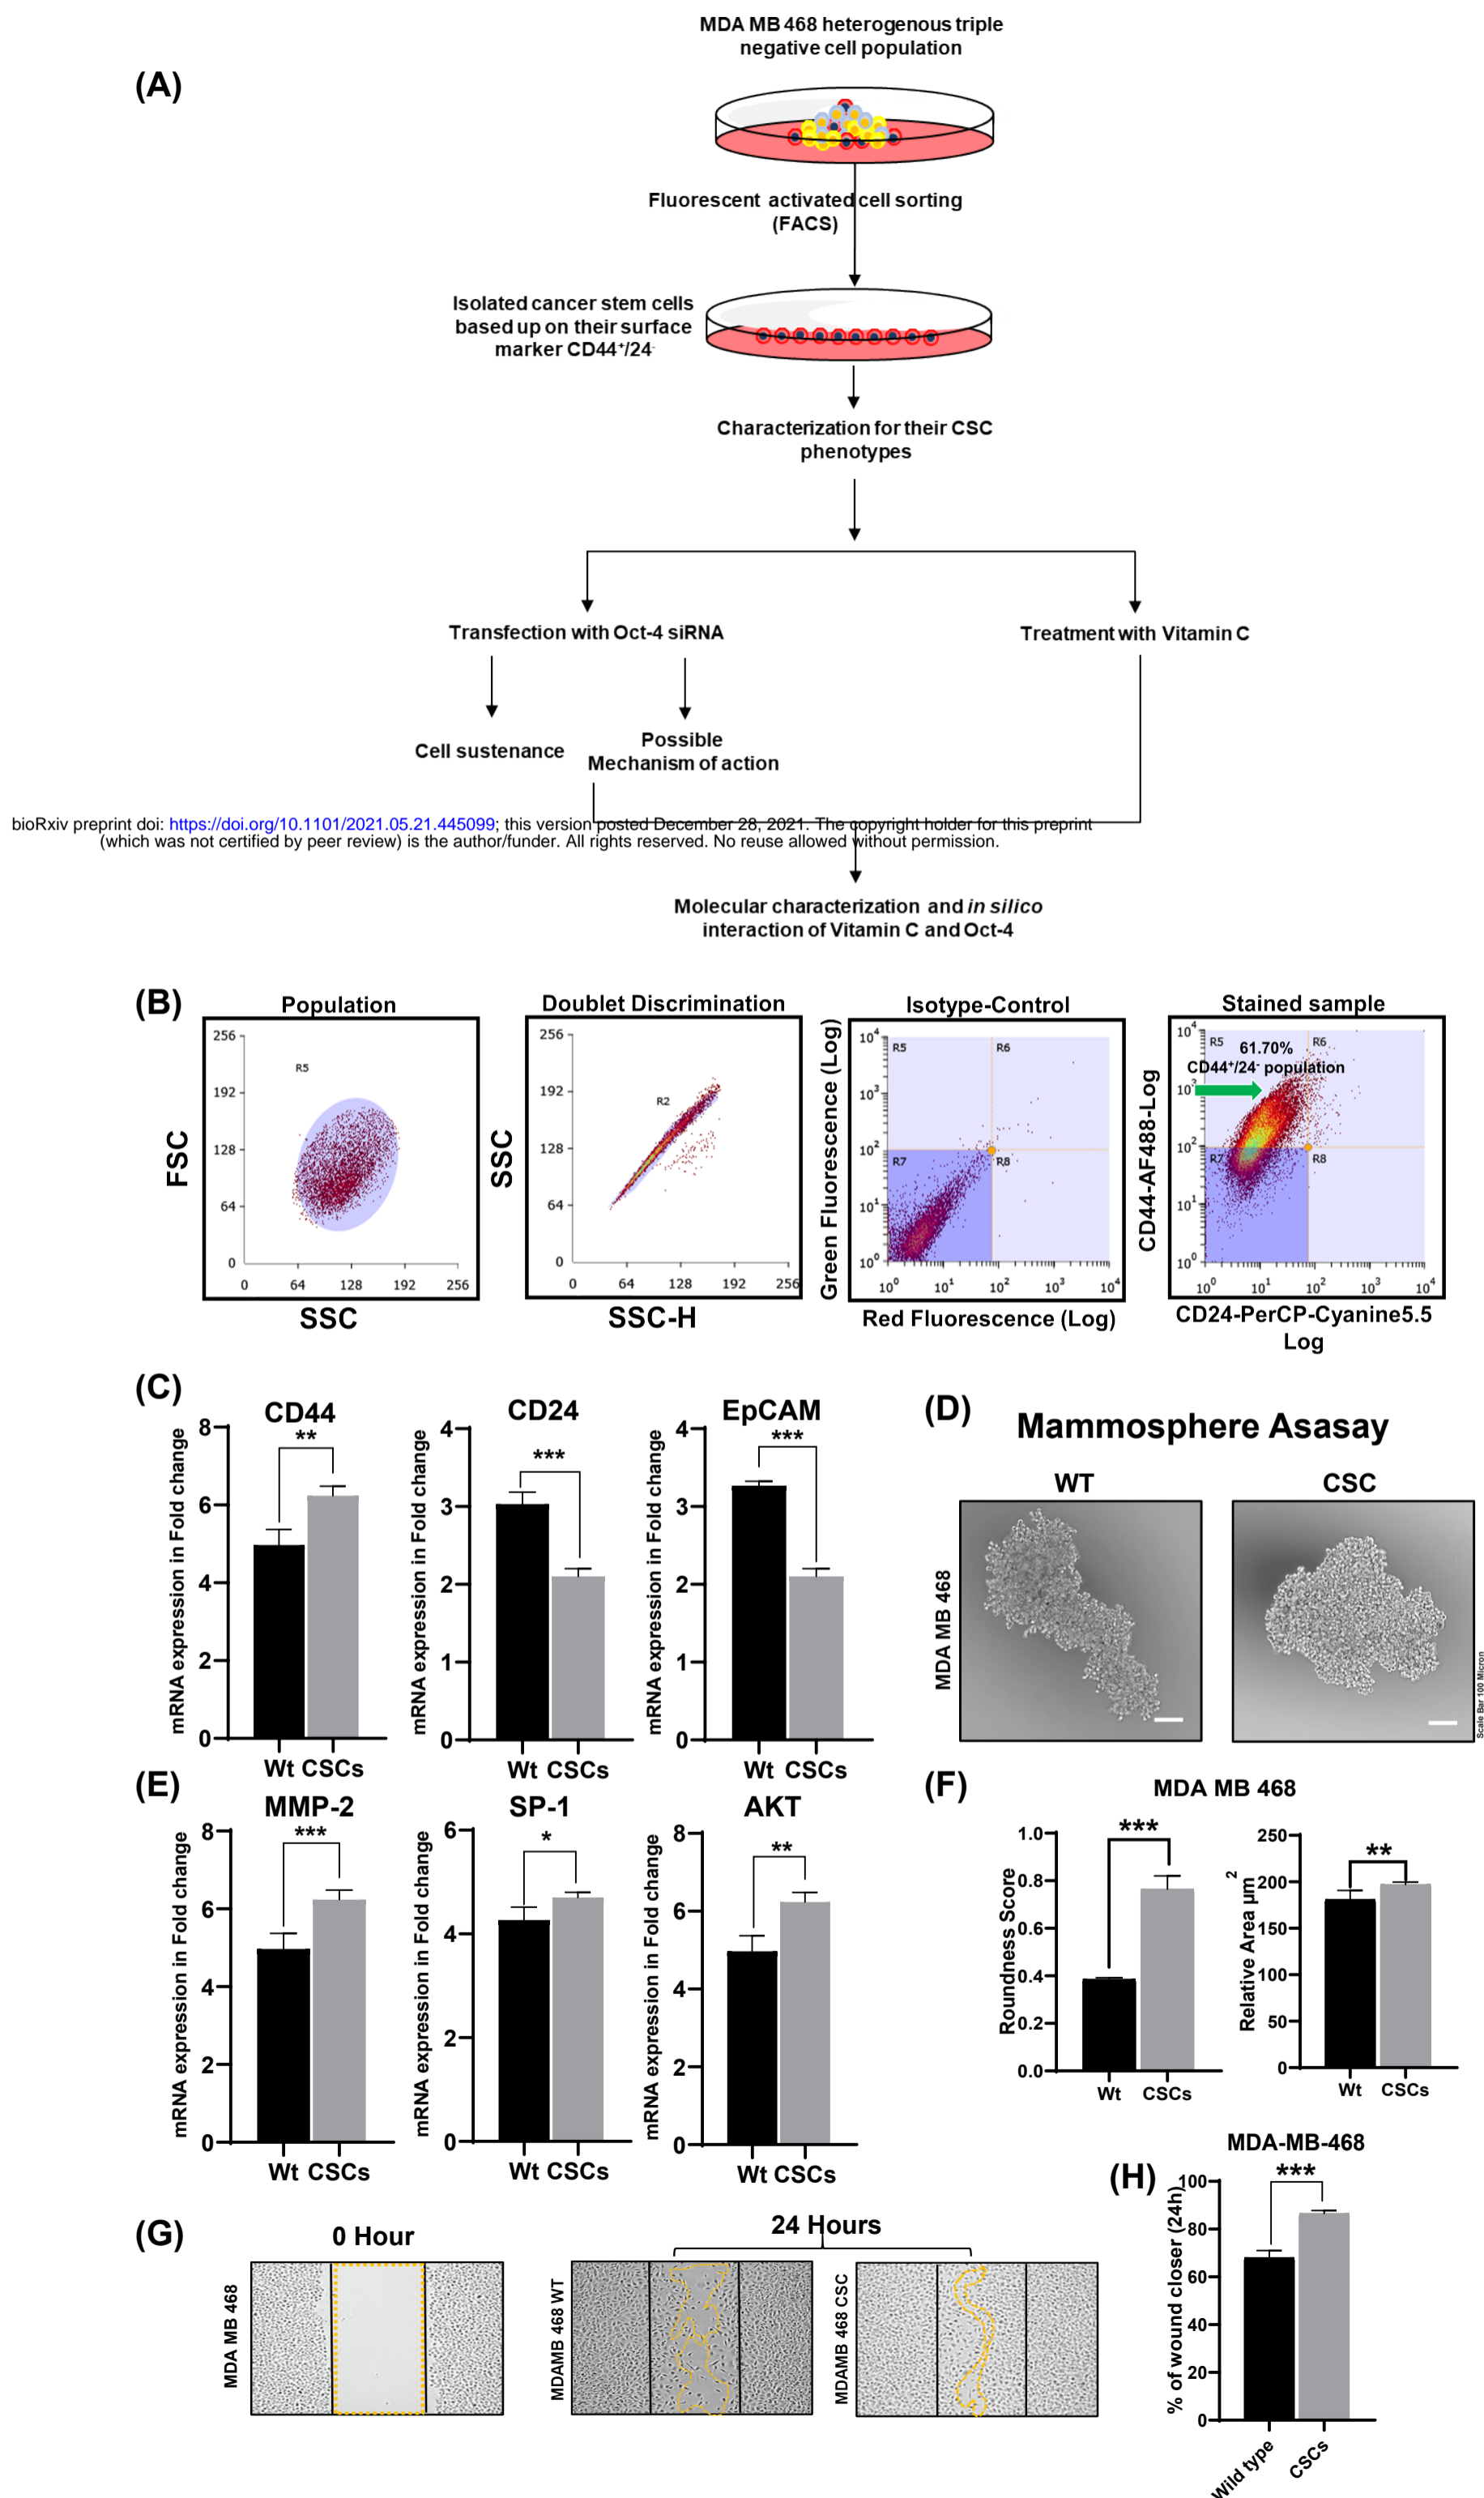

Figure-1



(A)

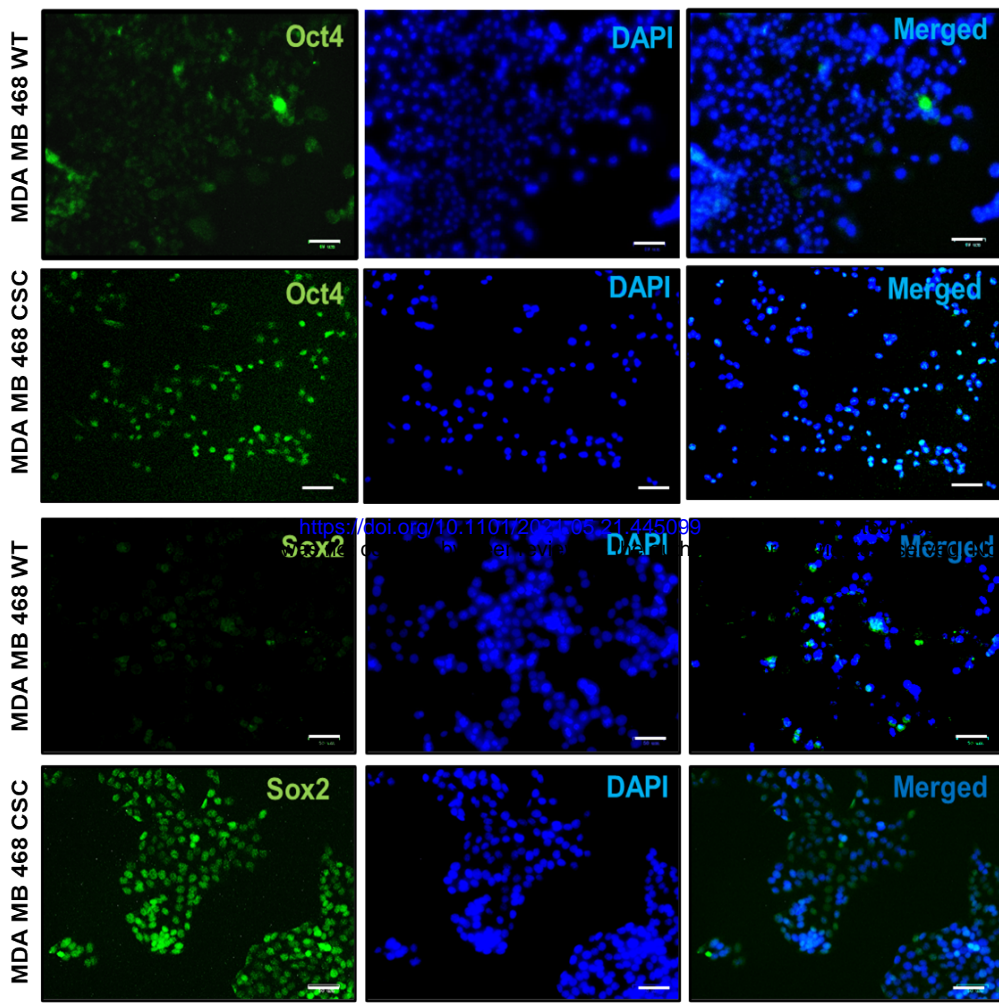

(B)

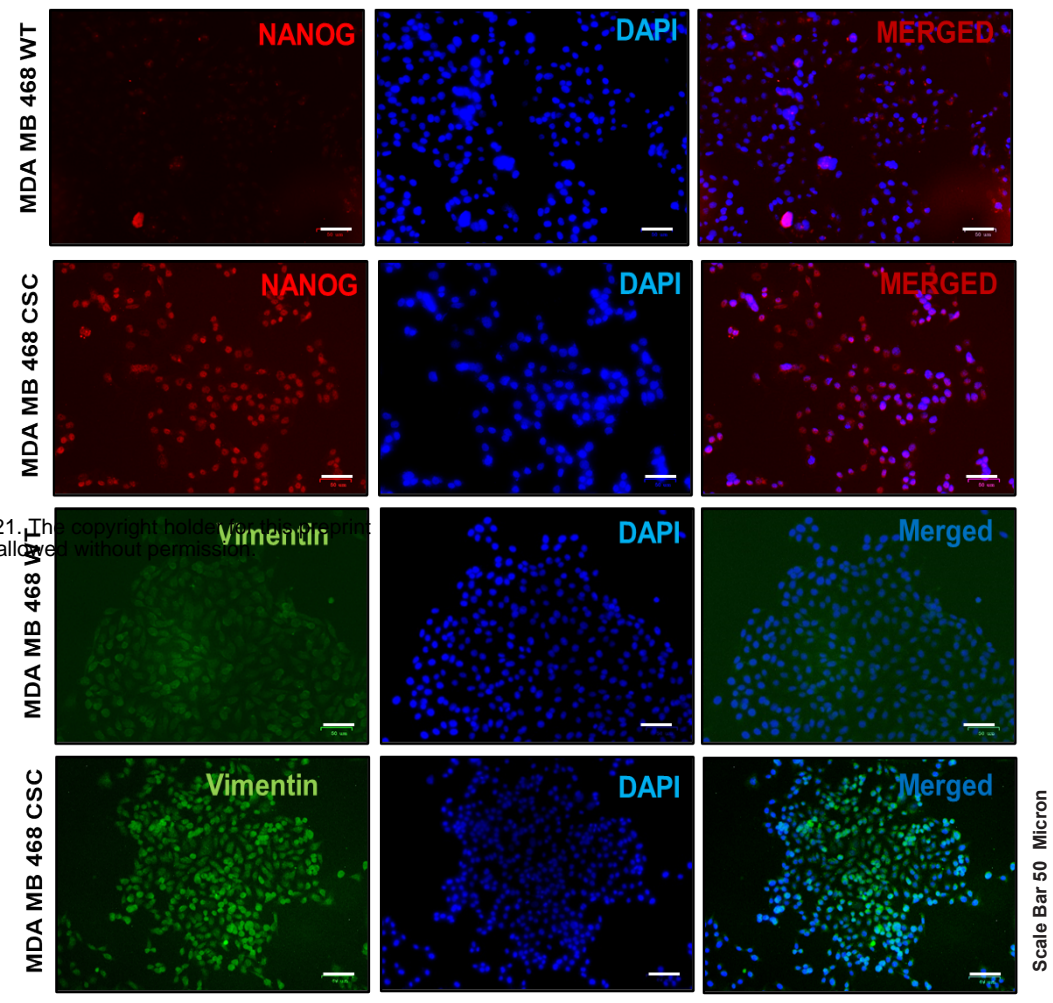

(C)

Human pluripotent embryonal carcinoma NTERA2 cell line

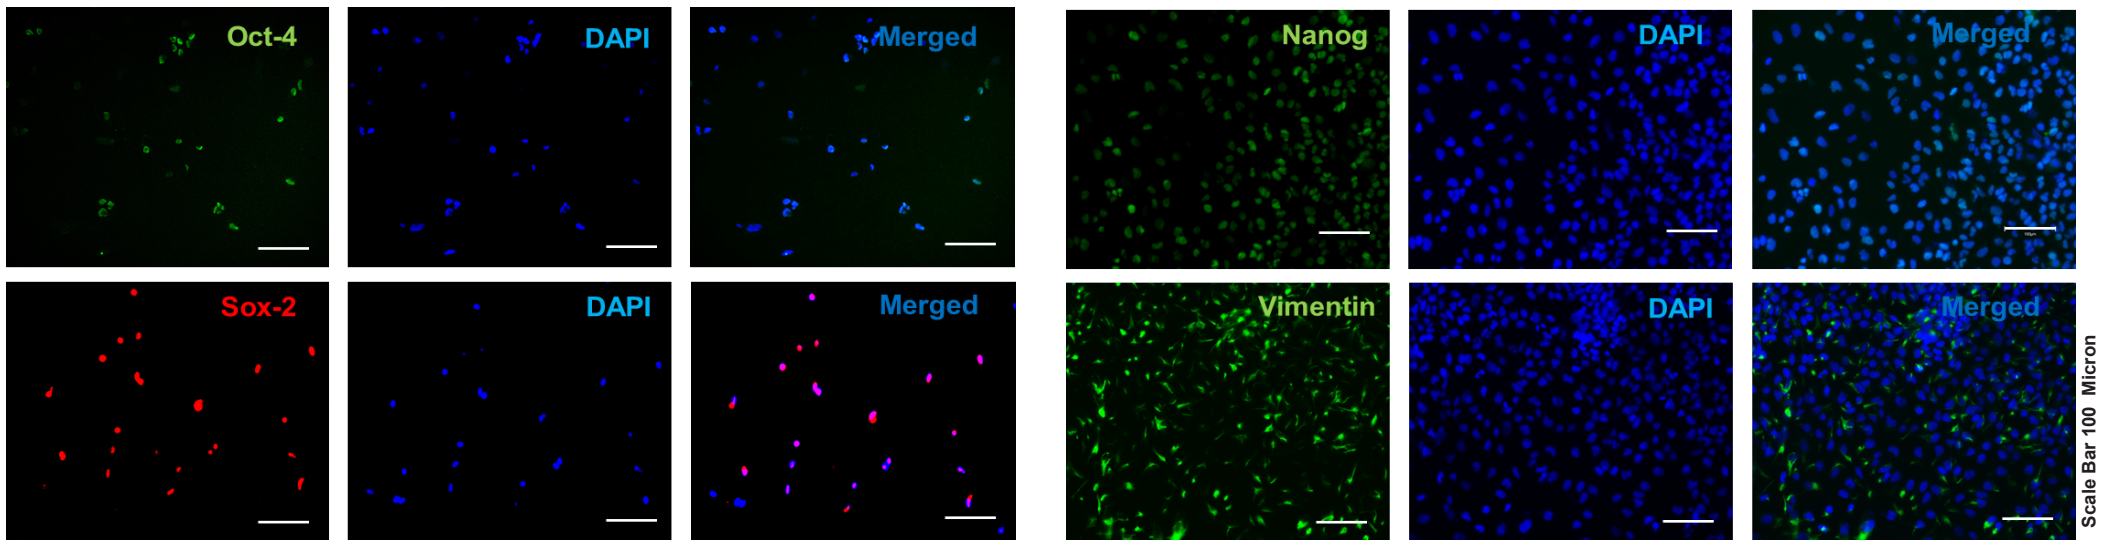

(D)

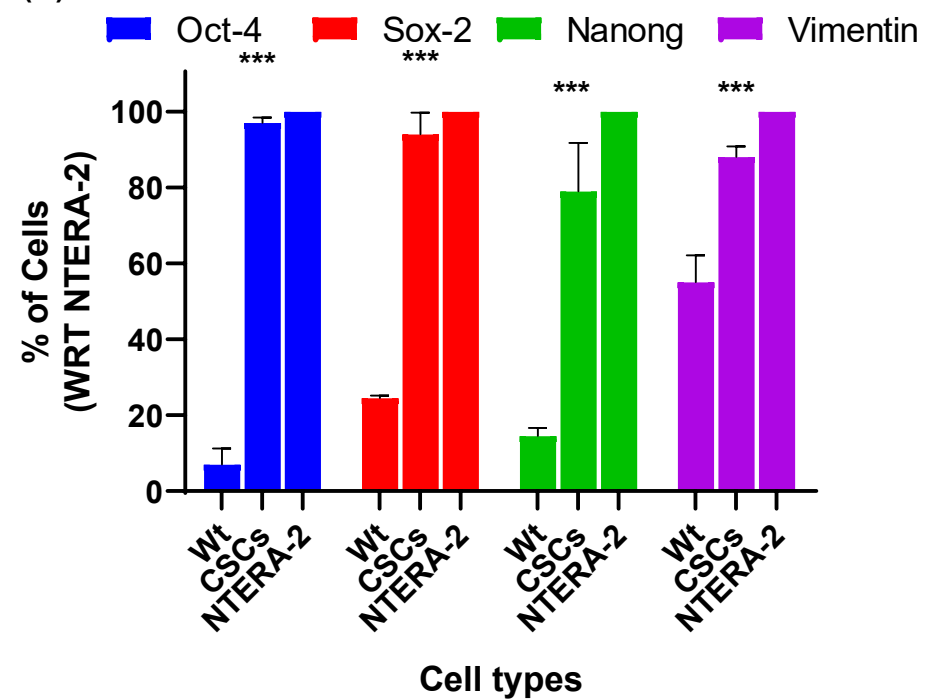

Figure-2



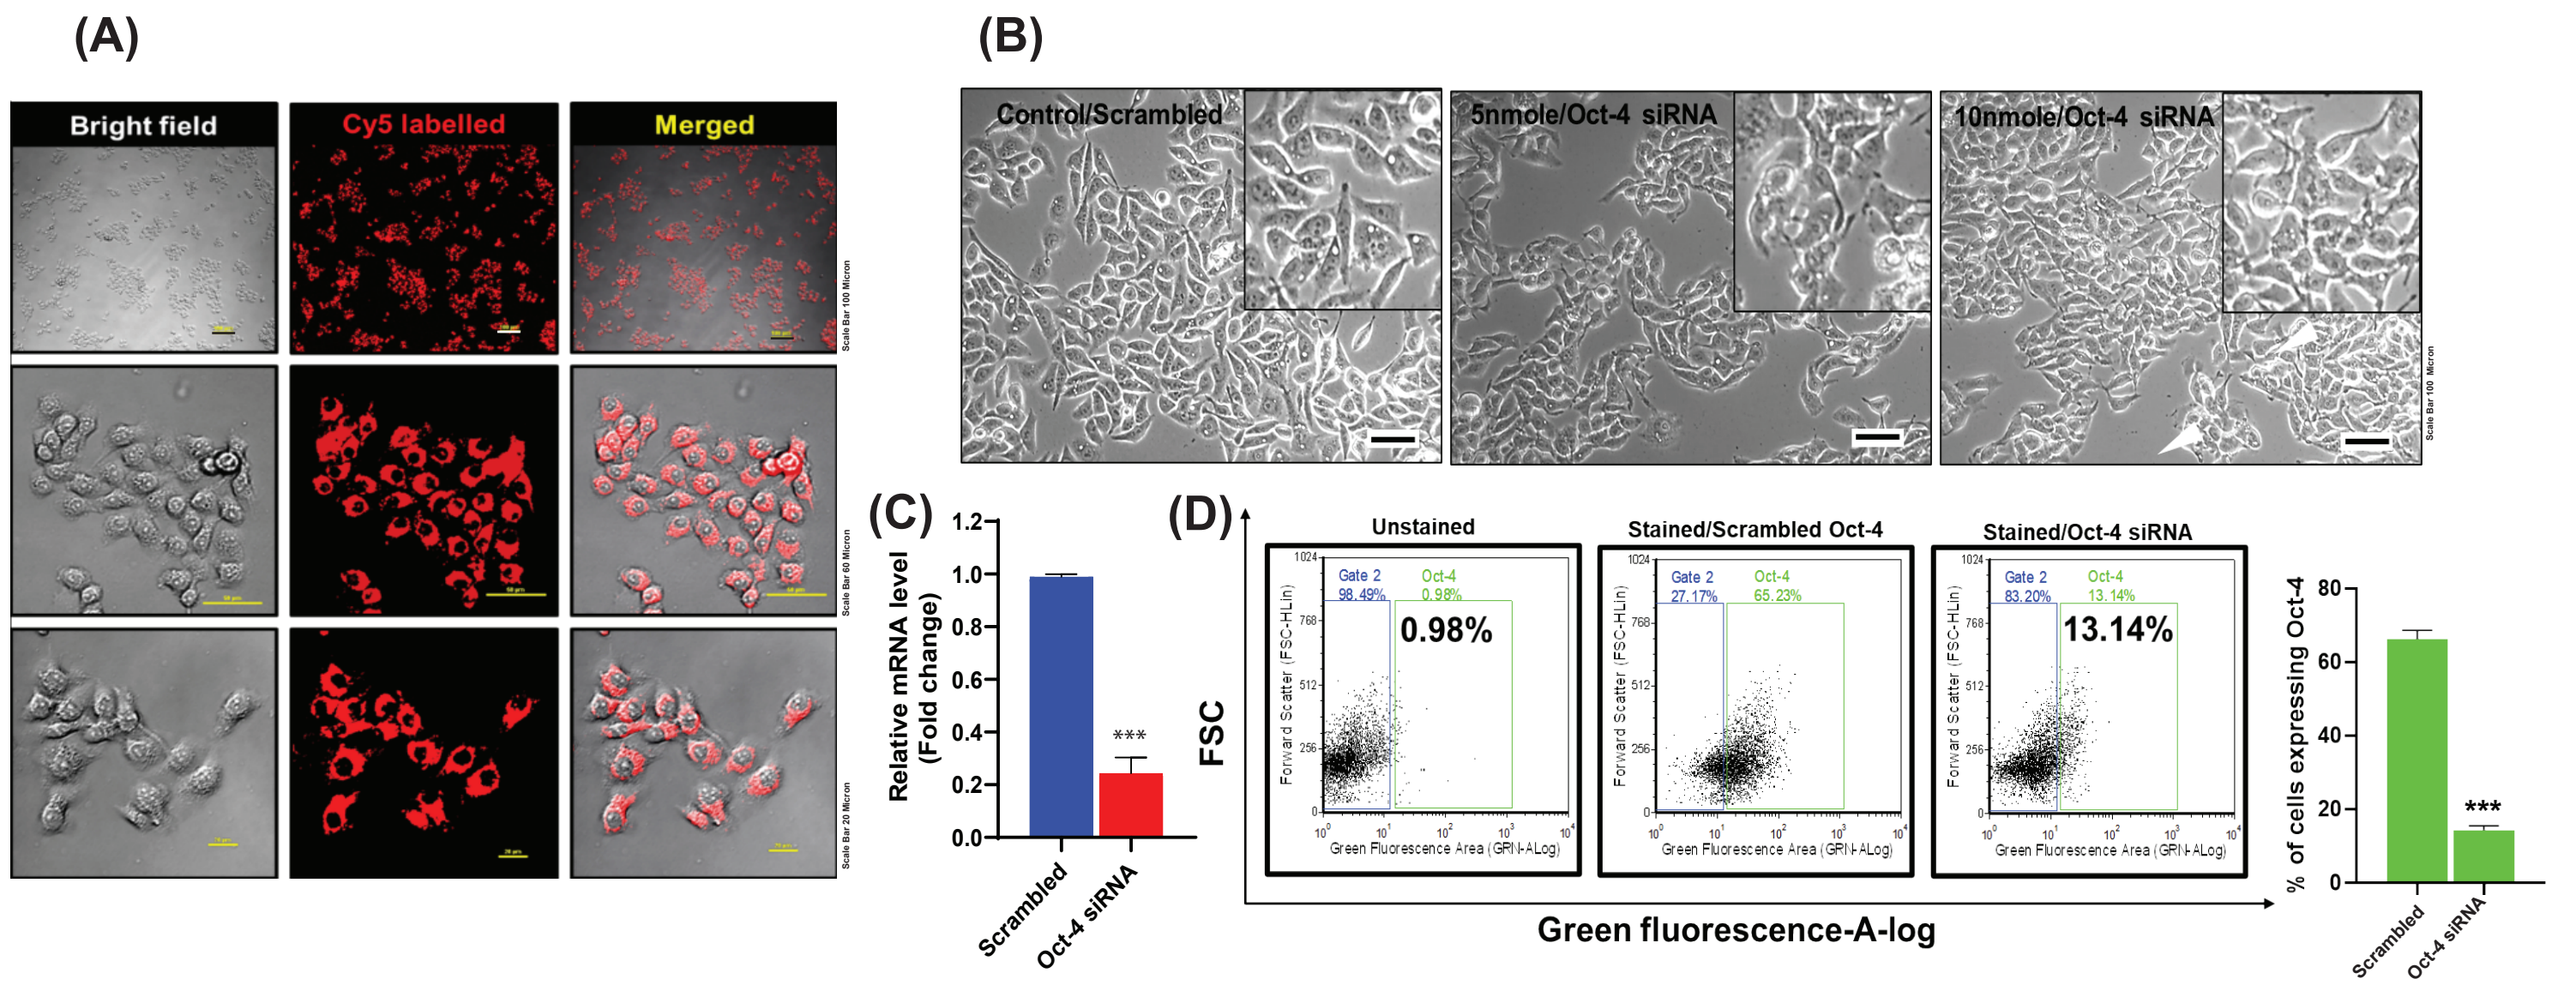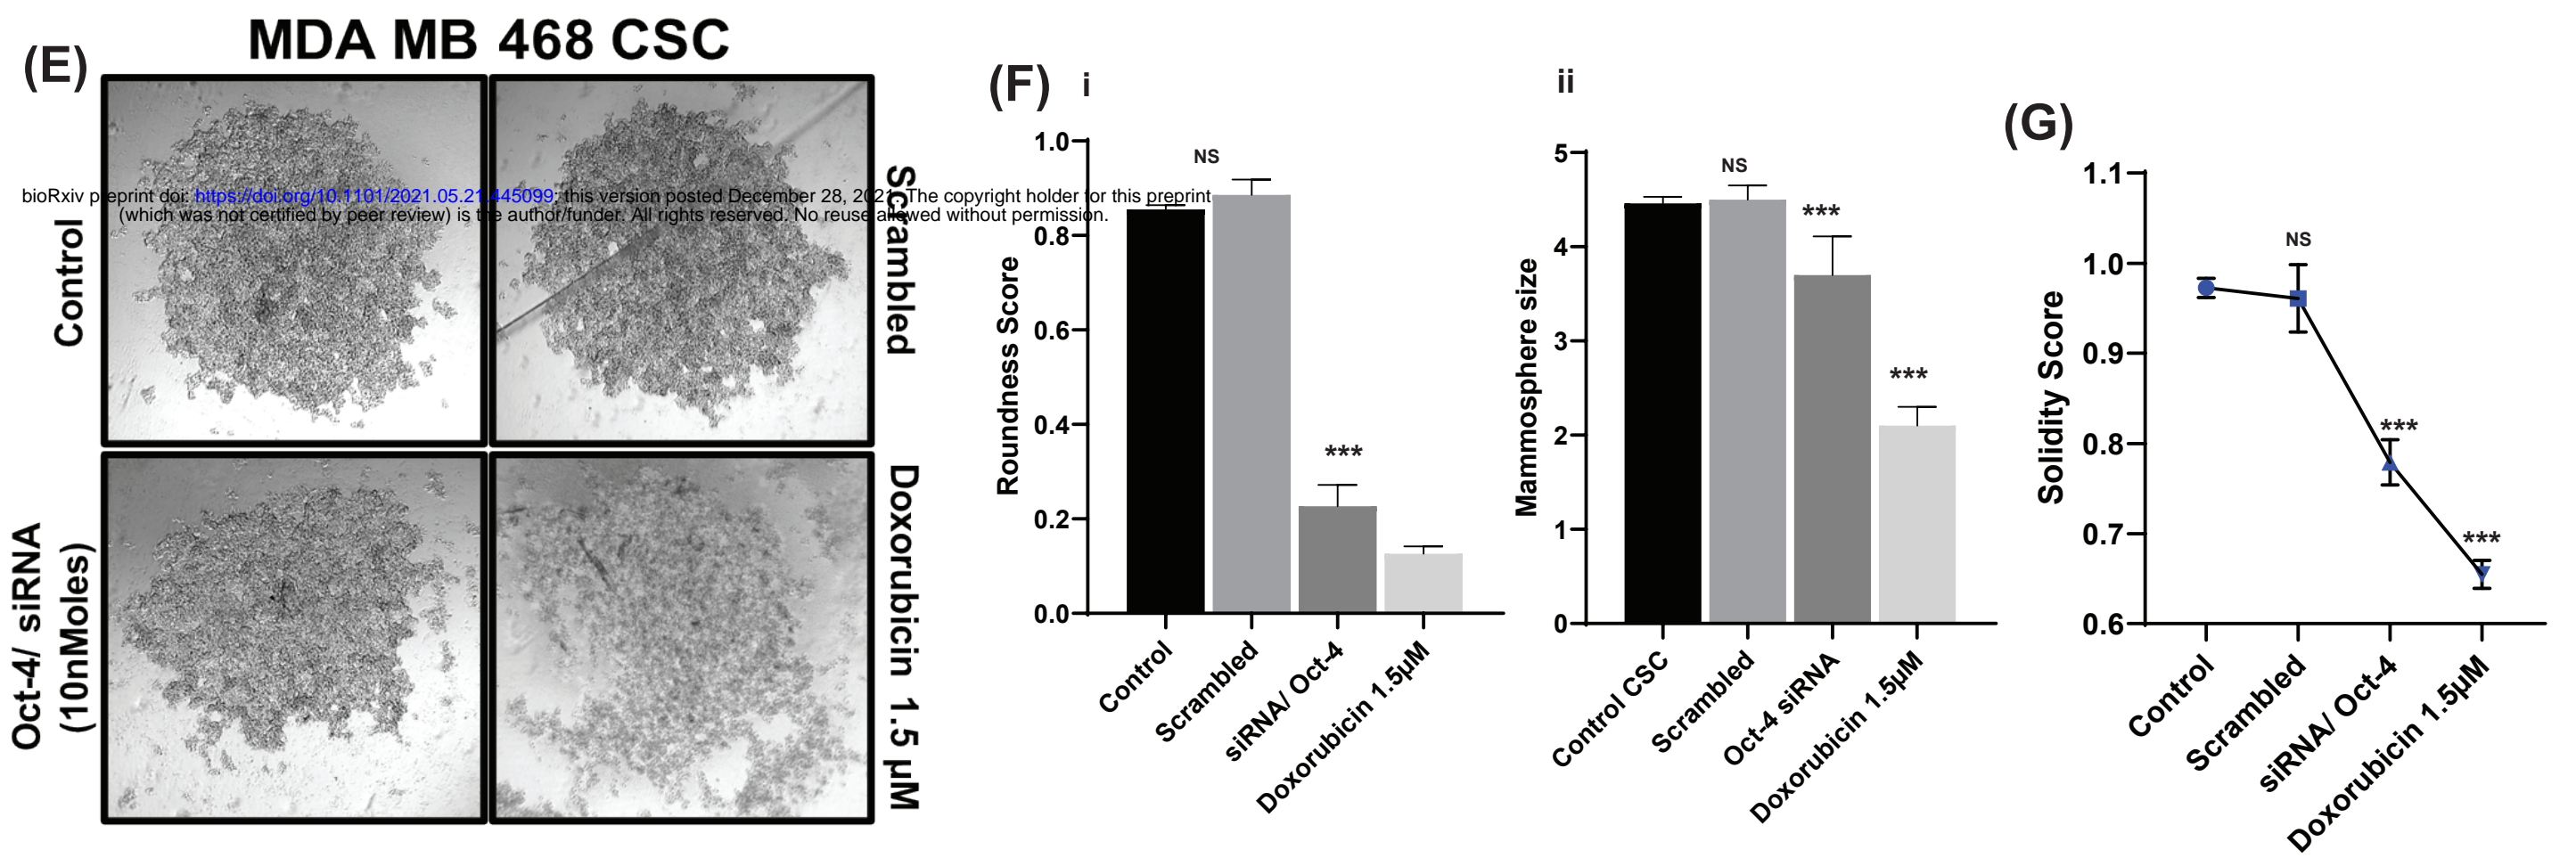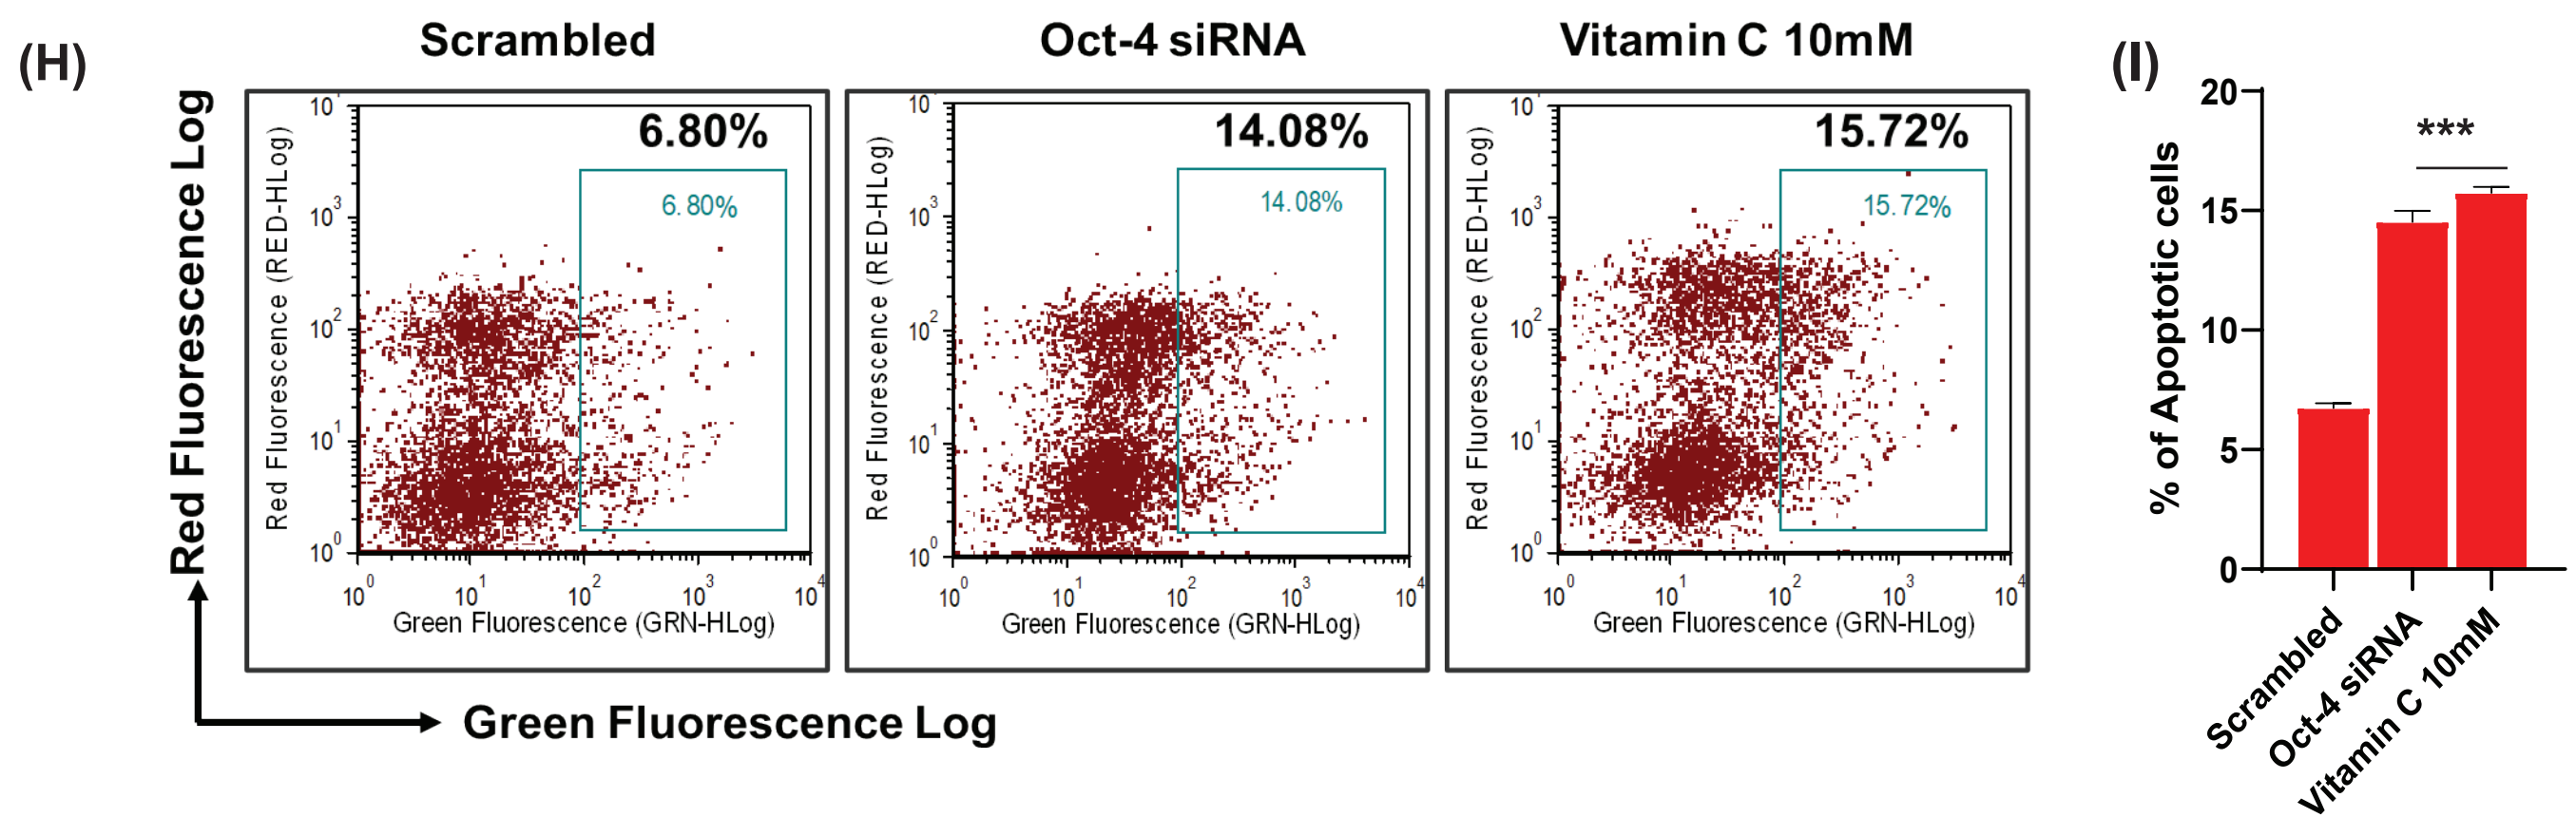

**Figure-3**



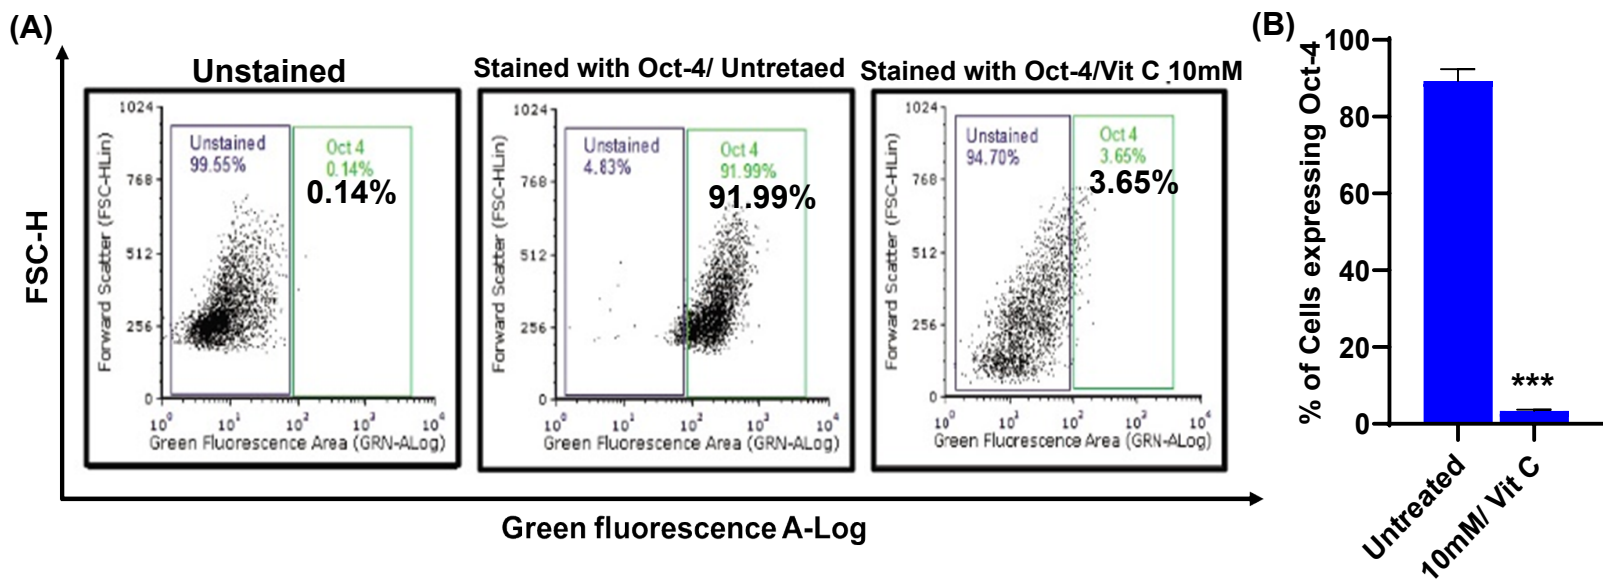

**(C)**

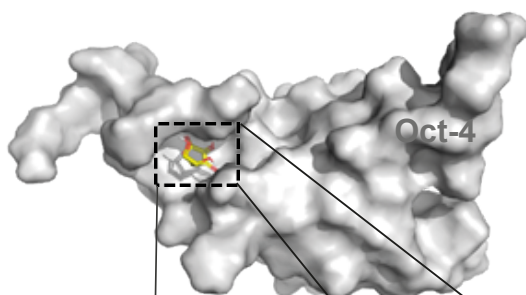

**(D)**

| Serial No. | Binding Energy (Kcal. Mol <sup>-1</sup> ) | Atoms of Vitamin C involved in H-bonding | Oct4 atoms involved in H-bonding | Bond length (Å) |
|------------|-------------------------------------------|------------------------------------------|----------------------------------|-----------------|
| 1.         | -5.1                                      | 8OH                                      | NH LYS 11                        | 2.3             |
|            |                                           | 10OH                                     | CO LYS 11                        | 2.6             |
|            |                                           | 1OH                                      | NH ARG 10                        | 1.8             |
| 2.         | -5.0                                      | 1OH                                      | NH LYS 9                         | 2.6             |
|            |                                           | 6O                                       | NH ARG 8                         | 2.5             |
|            |                                           | 6O                                       | NH ARG 10                        | 2.3             |
|            |                                           | 10OH                                     | CO LYS 11                        | 2.3             |
| 3.         | -4.9                                      | 12OH                                     | CO LYS 11                        | 2.5             |
|            |                                           | 12OH                                     | CO LEU 15                        | 2.1             |
|            |                                           | 6O                                       | NH LYS 9                         | 2.1             |
|            |                                           | 6O                                       | NH ARG 10                        | 1.9             |
|            |                                           | 10OH                                     | CO ARN17                         | 2.2             |

**(E)**

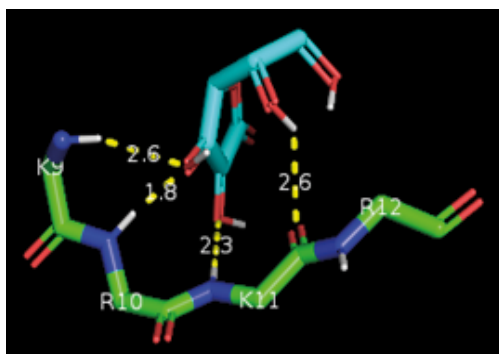

**(F)**

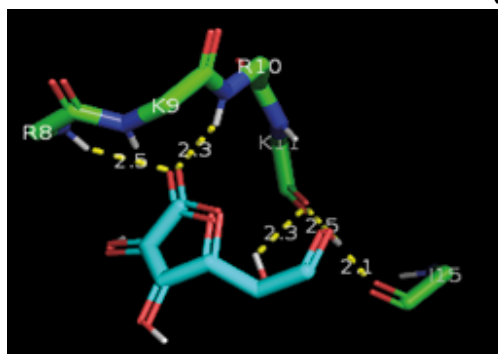

**(G)**

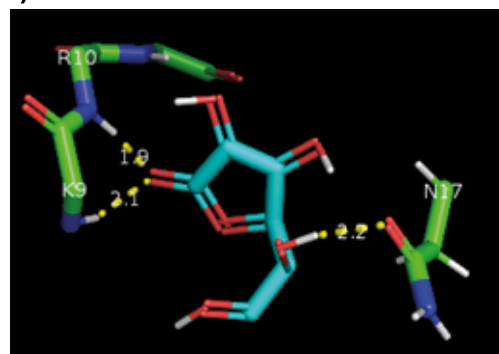

**Figure-4**

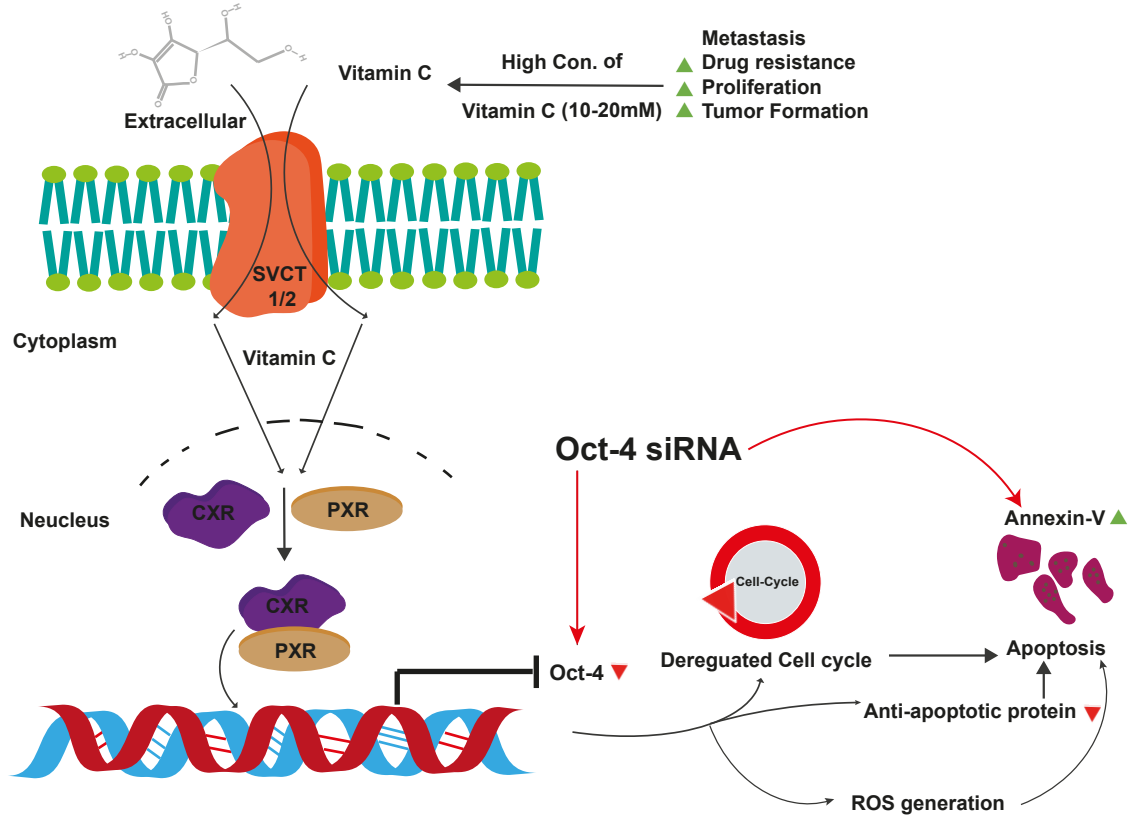

**Figure-5**
